# Supplementary material for: Secure transmission for heterogeneous cellular network with limited feedback
Source: Springer Nature journal article supplement (doi:10.1007/s11432-019-2836-0), 2020-11-11
Supplement: 11432_2019_2836_MOESM1_ESM.pdf [file 11432_2019_2836_MOESM1_ESM.pdf]

• Supplementary File •

## Secure transmission for heterogeneous cellular network with limited feedback

Wenyu JIANG, Kaizhi HUANG\*, Shuaifang XIAO & Xiaoming XU

*PLA Strategic Support Force Information Engineering University, Zhengzhou 450002, china*

### Appendix A Proof of Lemma 1:

According to the total probability theorem and the fact that  $|\hat{h}_{io}|^2$  and  $|\hat{h}_{iu}^H h_i|^2$  are independent, the  $\|h_{io}^*\|^2$  can be expressed as:

$$\begin{aligned} & P(|h_{iu}^H|^2 |\hat{h}_{iu}^H h_i|^2 \leq x) \\ & \stackrel{(a)}{=} \int_0^\infty P(|\hat{h}_{iu}^H h_i|^2 \leq x/t | |h_{iu}^H|^2 = t) f_{|h_{iu}^H|^2}(t) dt \\ & = \int_0^\infty F_{|\hat{h}_{iu}^H h_i|^2}(x/t) f_{|h_{iu}^H|^2}(t) dt \end{aligned} \quad (A1)$$

Where (a) holds for the total probability theorem. Such we have the CDF of  $|\hat{h}_{iu}^H h_i|^2$  in (5), and  $|\hat{h}_{io}|^2 \sim \text{Gamma}(N_i, 1)$ . Due to piecewise function in(5), we forms the integral in (A1) into:

$$\begin{aligned} & P(|h_{iu}^H|^2 |\hat{h}_{iu}^H h_i|^2 \leq x) \\ & = \int_x^{x/(1-\varepsilon)} (1 - 2^B(1-x/t)^{N_i-1}) \frac{t^{N_i-1} e^{-t}}{\Gamma(N_i)} dt + \int_0^x f_{|h_{iu}^H|^2}(t) dt \\ & \stackrel{(b)}{=} F_\gamma(N_i, \frac{x}{1-\varepsilon}) - 2^B e^{-x} F_\gamma(N_i, \frac{\varepsilon x}{1-\varepsilon}) \\ & = \sum_{m=0}^{N_i-1} \frac{(\frac{x}{1-\varepsilon})^m e^{-\frac{x}{1-\varepsilon}} (2^B \varepsilon^m - 1)}{\Gamma(m+1)} + 1 - 2^B e^{-x} \end{aligned} \quad (A2)$$

Where (b) comes from the definition of the CDF of gamma distribution. And  $F_\gamma(N_i, x)$  represents the CDF of Gamma distribution with parameter  $N_i$ , which is given by  $F_\gamma(N_i, x) = 1 - \sum_{m=0}^{N_i-1} \frac{x^m e^{-x}}{m!}$ . We noted that the property of  $x$  and  $B_i$  can be analyzed easier under fixed  $N_i$  because of the characteristic of Gamma distribution.

### Appendix B Proof of Lemma 2:

We bring the CDF of  $\|h_{io}^*\|^2$  into (10), and the expression contains the power of three added random variables, which is hard to solve. First, we pull back the influence of estimation error into  $I_{err,average} = P_i |X_{iu}|^{-\alpha_i} \sigma_m^2$  and get the lower bound of coverage probability[36]. We find that the formula contains power of two added random variables. Therefore, (12) transforms into:

$$\begin{aligned} p_c^i & \geq E_{I_{ui}} \left( \sum_{m=0}^{N-1} \frac{(\frac{\lambda}{1-\varepsilon})^m e^{-\frac{\lambda}{1-\varepsilon}} (2^B \varepsilon^m - 1)}{\Gamma(m+1)} + 1 - 2^B e^{-\lambda} \right) \\ & = \sum_{m=0}^{N-1} \frac{E_{I_{ui}} \left( (\frac{\lambda}{1-\varepsilon})^m e^{-\frac{\lambda}{1-\varepsilon}} (2^B \varepsilon^m - 1) \right)}{\Gamma(m+1)} + 1 - 2^B E_{I_{ui}}(e^{-\lambda}) \\ & \stackrel{(a)}{=} \sum_{m=0}^{N-1} \sum_{p=0}^m \binom{m}{p} \frac{(-1)^m L_{I_{ui}}^{(m)}(\frac{K}{1-\varepsilon}) (\frac{K \sigma_1^2}{1-\varepsilon})^{m-p} e^{-\frac{K \sigma_1^2}{1-\varepsilon}} (2^B \varepsilon^m - 1)}{\Gamma(m+1)} + 1 - 2^B e^{-K \sigma_1^2} L_{I_{ui}}(K) \end{aligned} \quad (B1)$$

Which  $\sigma_1^2 = \sigma_u^2 + P_i |X_{iu}|^{-\alpha_i} \sigma_m^2$ . The process (a) is obtained by[38] with p-order derivative of Laplace transform of  $\mathcal{L}_{I_o}(s)$ . The Laplace transform is given by:

$$\begin{aligned} \mathcal{L}_{I_o}(s) & \stackrel{(b)}{=} \prod_{j=1}^K E_{\theta_j^o} [\exp(-K \sum_{j \in \theta_b, j \neq i} P_j \|h_{ju}\|^2 |x_j|^{-\alpha_j})] \\ & \stackrel{(c)}{=} \prod_{j=1}^K \exp(-2\pi \lambda_j \int_x^\infty (1 - \varpi(P_j)) r dr) \end{aligned} \quad (B2)$$

\* Corresponding author (email: huangkaizhi@tsinghua.org.cn)

Which  $\varpi(P_j) = \int_0^\infty e^{-Kpr^{-\alpha_j}} f_{P_j} \|h_{uj}\|^2(p) dp$  with  $P_j \|h_{uj}\|^2 \sim \text{Gamma}(N_j, P_j)$ . And (b) is obtained by the definition of Laplace transform, and (c) is using the Probability Generating functional (PGFL) of Stochastic Geometric theory, expressed as:

$$G[f(x)] = E \left( \prod_{x \in \Phi} f(x) \right) = \exp \left( -\lambda \int_{\mathbb{R}^2} (1 - f(x)) dx \right) \quad (\text{B3})$$

Applying [28, 3.191],  $\varpi(P_j)$  can simplified into:

$$\begin{aligned} \varpi(P_j) &= \int_0^\infty \frac{1}{\Gamma(N_j) P_j^{N_j}} e^{-Kpr^{-\alpha_j}} p^{N_j-1} e^{-p/P_j} dp \\ &= P_j^{-N_j} \left( \frac{1}{P_j} + Kr^{-\alpha_j} \right)^{-N_j} = (1 + KP_j r^{-\alpha_j})^{-N_j} \end{aligned} \quad (\text{B4})$$

And using [28, 3.194], the Laplace transform is calculated as:

$$\mathcal{L}_{I_o}(s) = E_{I_o} \left[ e^{-sI_o} \right] = \prod_{j \in \mathcal{K}} \mathcal{L}_{I_{j_o}}(s) \quad (\text{B5})$$

So, the Laplace transform is obtained by (B2) and (B4), usingsimplified as (15). with the help of the[21], we can further obtain the expression of p-order Laplace transform as:

$$\begin{aligned} L_{I_{ui}}^{(p)}(s) &= \sum_{j=1}^k \pi \lambda_j \sum_{z=0}^p L_{I_{ui}}^{(z)}(s) (p-z)! \int_x^\infty \frac{(P_j r^{-\alpha_j})^{p-z}}{(1+sP_j r^{-\alpha_j})^{N_j+p-z}} dr \\ &= \sum_{j=1}^k \pi \lambda_j \sum_{z=0}^p L_{I_{ui}}^{(z)}(s) \int_{P_j x^{-\alpha_j}}^\infty \frac{(p-z)!(y)^{p-z+1/\alpha_j+1}}{(P_j)^{-1/\alpha_j} (1+sy)^{N_j+p-z}} dy \\ &= \sum_{z=0}^p \sum_{j=1}^k \pi \lambda_j L_{I_{ui}}^{(z)}(s) \frac{(p-z)!(P_j x^{-\alpha_j})^{-N_j-1/\alpha_j}}{(P_j)^{-1/\alpha_j} s^{N_j+p-z} (N_j+1/\alpha_j)} {}_2F_1(N_j+p-z, N_j+1/\alpha_j; N_j+1/\alpha_j+1; -\frac{1}{sP_j x^{-\alpha_j}}) \end{aligned} \quad (\text{B6})$$

### Appendix C proof of lemma3

As (18) is obtained, using the PGFL over PPP in (a) and the Jensen inequality in (b), the upper bound is satisfied:

$$\begin{aligned} &E_{r, I_{ei}} \left( 1 - \prod_{e \in \theta_e} P(|\hat{h}_{ie}^H h_i|^2 < \frac{(2^{R_e}-1)(I_{ei}+\sigma_e^2)}{P_i |Y_{ie}|^{-\alpha_i}}) \right) \\ &\stackrel{(a)}{=} 1 - \exp(-\pi \lambda_e \int_0^\infty 1 - P(|\hat{h}_{ie}^H h_i|^2 < \frac{(2^{R_e}-1)(I_{ei}+\sigma_e^2)}{P_i |Y_{ie}|^{-\alpha_i}}) dy) \\ &\stackrel{(b)}{\geq} 1 - \exp(-\pi \lambda_e \int_0^\infty E_{I_{ei}} \left( \exp(-\frac{(2^{R_e}-1)(I_{ei}+\sigma_e^2)}{P_i |Y_{ie}|^{-\alpha_i}}) \right) dy) \\ &= 1 - \exp(-\pi \lambda_e \int_0^\infty \left( \exp(-\frac{(2^{R_e}-1)\sigma_e^2}{P_i |Y_{ie}|^{-\alpha_i}}) L_{I_{ei}} \left( \frac{(2^{R_e}-1)}{P_i |Y_{ie}|^{-\alpha_i}} \right) \right) dy) \end{aligned} \quad (\text{C1})$$

Similarly, we can further get the expression of  $\mathcal{L}_{I_{ei}}$  as:

$$\begin{aligned} L_{I_{ei}}(s) &= \exp(-\pi \sum_{j=1}^K \lambda_j \int_0^\infty r(1 - (1 + sP_j r^{-\alpha_j})^{-N_j}) dr) \\ &= \exp(-\pi \sum_{j=1}^K \lambda_j 1/\alpha_j (sP_j)^{2/\alpha_j} \sum_{k=1}^{N_j} B(1 - 2/\alpha_j, k + 2/\alpha_j - 1)) \end{aligned} \quad (\text{C2})$$

As for the lower bound described above, we can show the expression with the help of  $P(|\hat{h}_{ie}^H h_i|^2 < \frac{(2^{R_e}-1)(I_{ei}+\sigma_e^2)}{P_i |Y_{ie}|^{-\alpha_i}})$  calculated above:

$$\begin{aligned} p_s^i &\leq \int_0^\infty P(\log_2(1 + SNR_e) > R_e) f_e(r) dr \\ &= \int_0^\infty 2\pi \lambda \exp(-\frac{(2^{R_e}-1)\sigma_e^2}{P_i |r|^{-\alpha_i}} - \pi \sum_{j=1}^K \lambda_j 1/\alpha_j (k_2 P_j)^{2/\alpha_j} \sum_{k=1}^{N_j} B(1 - 2/\alpha_j, k + 2/\alpha_j - 1)) - \pi \lambda_e r^2) dr \end{aligned} \quad (\text{C3})$$
